# Supplementary material for: Xylem-Inspired Hydrous Manganese Dioxide/Aluminum Oxide/Polyethersulfone Mixed Matrix Membrane for Oily Wastewater Treatment
Source: MDPI journal article supplement (doi:10.3390/membranes12090860), 2022-09-05
Supplement: s1 [file s1]

## Supplementary Information

**Table S1.** Thickness of membrane, membrane porosity and mean pore size.

| Membrane | Membrane thickness (mm) | Membrane porosity (%) | Mean pore size (nm) |
|----------|-------------------------|-----------------------|---------------------|
| PES-0    | 0.092                   | 67.38%                | 11.37               |
| PES-1    | 0.102                   | 45.85%                | 56.66               |
| PES-2    | 0.102                   | 34.39%                | 57.12               |
| PES-3    | 0.116                   | 19.26%                | 169.00              |
| PES-4    | 0.114                   | 15.28%                | 114.87              |
| PES-5    | 0.110                   | 15.06%                | 64.41               |

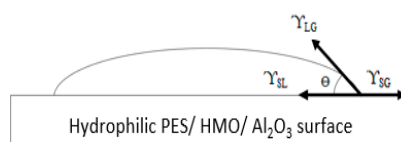

**Figure S1.** Water contact angle formed by the hydrophilic PES/HMO/Al<sub>2</sub>O<sub>3</sub> MMMs.

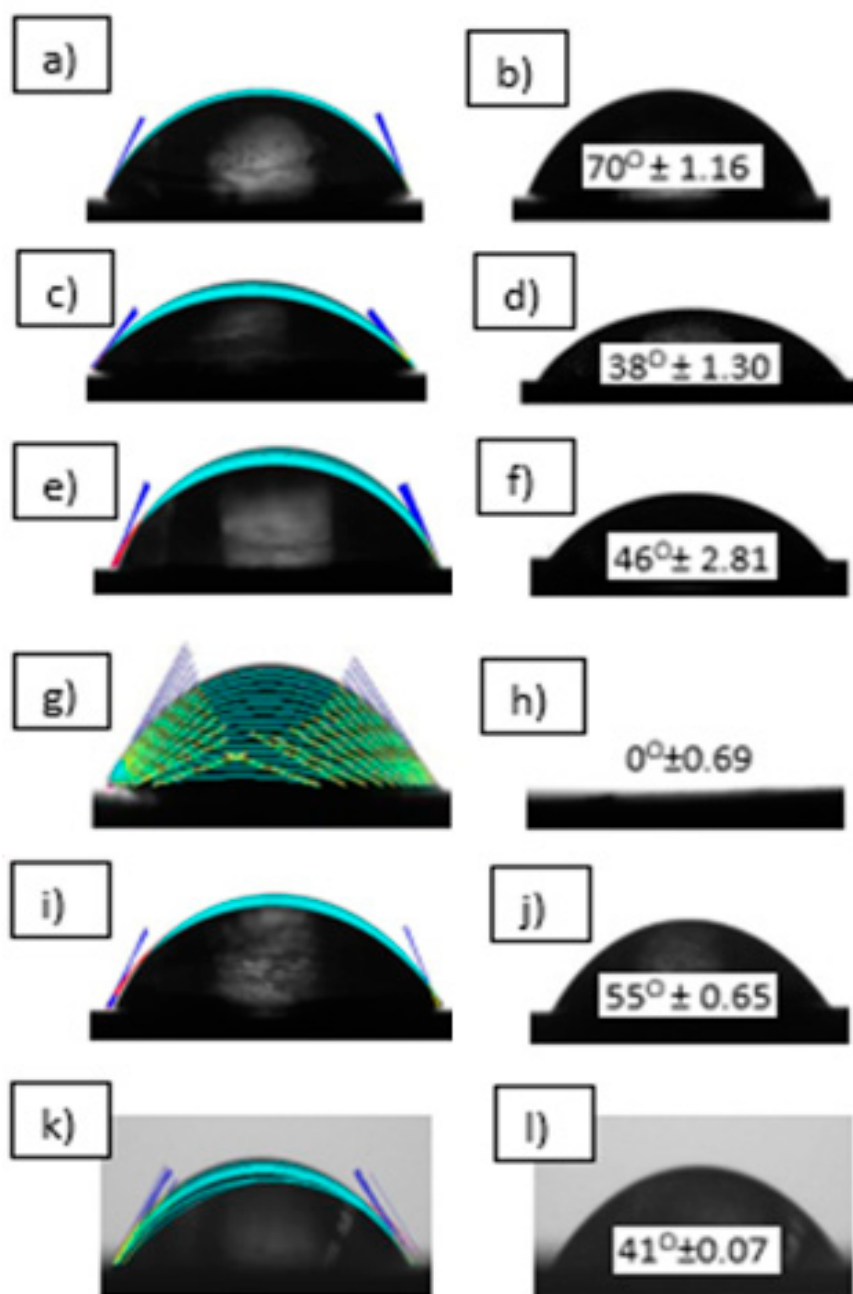

**Figure S2.** Water contact angle (WCA) of (a, b) PES 0, (c, d) PES 1, (e, f) PES 2, (g, h) PES 3, (i, j) PES 4 and (k, l) PES 5. Left images indicate water contact angle plot, while the right images indicate water contact angle values.
